# COVID-19 outbreaks in Australia during a period of high epidemic control, 2020

Freya G Hogarth<sup>1,2</sup>, Rachel Nye<sup>1</sup>, Nevada Pingault<sup>3</sup>, Dr Simon Crouch<sup>4</sup>, Cushla Coffey<sup>5</sup>, Kylie Smith<sup>6</sup>, Rowena Boyd<sup>7</sup>, Catherine Kelaher<sup>1</sup>, Tracie Rentin<sup>8</sup>, Moira C Hewitt<sup>1</sup>, Ben Polkinghorne<sup>2</sup>, Martyn D Kirk<sup>1,2\*</sup>

1. Australian Government Department of Health, Canberra, Australian Capital Territory, Australia
2. National Centre for Epidemiology and Population Health, The Australian National University, Canberra, Australian Capital Territory, Australia
3. Western Australian Department of Health, Perth, Western Australia, Australia
4. Victorian Department of Health, Melbourne, Victoria, Australia
5. Queensland Health, Brisbane, Queensland, Australia
6. Tasmanian Department of Health, Hobart, Tasmania, Australia
7. NT Department of Health, Darwin, Australia
8. New South Wales Department of Health, Sydney, Australia

\* Corresponding author

Email: [Martyn.Kirk@anu.edu.au](mailto:Martyn.Kirk@anu.edu.au) (MDK)

## 22 **Abstract**

23 To describe characteristics of COVID-19 outbreaks in Australia to guide policy  
24 development for mitigation of future outbreaks, we conducted a retrospective analysis of  
25 COVID-19 outbreaks affecting two or more people reported to COVID-Net—an Australian  
26 national surveillance network—from 28 January until 27 December 2020. The COVID-Net  
27 surveillance network covered all Australian states and territories, with an estimated population  
28 of 25,649,985 persons as at 31 June 2020. We reported the epidemiology of COVID-19  
29 outbreaks in Australia, including the setting in which they occurred, size, and duration.

30 853 outbreaks of COVID-19 were reported; associated with 13,957 confirmed cases, of  
31 whom 2,047 were hospitalised, and 800 died. The pattern of outbreaks followed a similar trend  
32 to the epidemic in Australia, defined by two distinct peaks in mid-March and July. Victoria  
33 reported the greatest number of outbreaks across all settings aligned with the second wave of  
34 infections. Outbreaks most commonly occurred in the workplace/industry setting (22%,  
35 190/853), followed by education (14%, 122/853), residential aged care (13%, 114/853) and  
36 hospitals (10%, 83/853). The majority (40%, 340/853) of outbreaks had 6 to 24 cases, and the  
37 median outbreak duration increased in proportion with the number of associated cases.

38 This report summarising COVID-19 outbreaks in Australia identifies settings of highest  
39 risk. Surveillance of outbreaks informs our understanding of transmission dynamics in  
40 Australia relative to national and jurisdictional interventions. For settings that are high risk for  
41 COVID-19, it is important to prioritise planning, surveillance, and implementation of control  
42 measures.

## 43 **Introduction**

44 Severe acute respiratory syndrome coronavirus 2 (SARS-CoV-2), the virus that causes  
45 coronavirus disease 2019 (COVID-19), has spread rapidly around the world since it was first

46 identified in December 2019 [1]. Basic reproductive number ( $R_0$ ) estimates for SARS-CoV-2  
47 range from 2–4; similar to or higher, than for severe acute respiratory syndrome and influenza  
48 virus [2, 3]. Because SARS-CoV-2 is highly infectious, COVID-19 outbreaks occur when  
49 people come into close contact with cases of COVID-19 [2, 4]. Early reports indicated that  
50 SARS-CoV-2 predominantly spread via respiratory droplets and fomites, emerging literature  
51 suggests transmission via aerosols is important [2, 5].

52 Outbreak investigations provide insights into SARS-CoV-2 transmission dynamics,  
53 including the risk in different settings and as an indicator of community transmission. Indoor  
54 and enclosed spaces where persons are in close proximity and there is low airflow increase the  
55 risk of SARS-CoV-2 infection [6, 7]. In these environments, behaviours such as sneezing,  
56 coughing, shouting, and singing result in greater volume of droplets suspended for longer  
57 periods [2, 8]. These environments may result in superspreader events, where one infectious  
58 individual infects a large number of secondary cases [8, 9]. Superspreader events are difficult  
59 to predict and result in epidemic growth that challenge control efforts [6, 10, 11].

60 In Australia during March 2020, the first epidemic wave of COVID-19 was  
61 characterised by cases arriving on international cruise ships and by air. This was followed by  
62 local transmission in settings where people congregate. Australian state and territory  
63 governments instituted extensive non-pharmaceutical interventions, along with case isolation,  
64 and tracing and quarantine of contacts. The Communicable Diseases Network Australia  
65 (CDNA) developed a national surveillance plan that included capturing data on outbreaks [12].

66 The Australian Government established COVID-Net, a surveillance network to support  
67 jurisdictional investigation of COVID-19 outbreaks and collect national surveillance data.  
68 States and territories have reported outbreaks and clusters of COVID-19, with Victoria  
69 experiencing a second wave due to community transmission.

70 In this report, we characterise outbreaks using surveillance data during a setting of high  
71 epidemic control in Australia. We examine where outbreaks occurred and identify factors  
72 associated with transmission.

73

## 74 **Methods**

### 75 **COVID-19 outbreak definition**

76 We defined a case of COVID-19 as a person testing positive to a SARS-CoV-2 real-  
77 time reverse transcription-polymerase chain reaction (RT-PCR) assay, and a primary case as  
78 the first known case of the outbreak [2]. If a case in one outbreak became the primary case in  
79 a secondary outbreak, the case may have been included in both outbreaks.

80 We defined a COVID-19 outbreak as two or more cases (who did not reside in the same  
81 household) among a specific group of people and/or over a specific period of time where illness  
82 was associated with a common source of infection. We defined a multi-jurisdictional outbreak  
83 as involvement of two or more jurisdictions in the outbreak, regardless of where exposure  
84 occurred.

### 85 **Data sources**

86 Our report includes outbreak data reported by all jurisdictions to COVID-Net, from 28  
87 January until 27 December 2020 inclusive, while New South Wales (NSW) reported outbreaks  
88 from 5 July 2020 onwards. Local public health units investigated outbreaks and collected data  
89 that were reported by COVID-Net epidemiologists using a REDCap (Research Electronic Data  
90 Capture) database hosted at the Australian Government Department of Health [13].

91 Data collected for each outbreak included place of acquisition of the primary case, and  
92 number of cases, hospitalisations, and deaths. We categorised outbreaks as one of 13 settings

93 and 56 sub-settings where the outbreak primarily occurred (S2 Appendix). The outbreak  
94 duration was derived by the number of days between the first and last positive specimen  
95 collected in the outbreak, plus 14 days from the last specimen date.

96 We obtained the total number of COVID-19 cases notified up to 27 December 2020  
97 from the National Notifiable Disease System (NNDSS).

## 98 **Data analysis**

99 We performed analyses in R 4.0.0 on a dataset extracted on 28 January 2021. We used  
100 population data from the Australian Bureau of Statistics Estimated Resident Population (as at  
101 31 June 2020) to estimate rates of outbreaks by jurisdiction.

102 We analysed outbreak data by two distinct peaks relative to the 1 June 2020: from 28  
103 January 2020 to 31 May 2020, and 1 June 2020 to 27 December 2020. We refer to these two  
104 periods as the first wave and second wave, respectively.

## 105 **Ethics**

106 Surveillance activities were conducted for and on behalf of the Australian Government  
107 Department of Health under the National Health Security Act 2007. The activities were  
108 approved by the Australian National University Human Ethics Committee  
109 [HREC/17/ANU/909].

110

## 111 **Results**

### 112 **National overview**

113 COVID-Net sites reported 853 outbreaks of COVID-19, associated with 13,957  
114 confirmed cases, of whom 2,047 were hospitalised, and 800 died. The median number of cases

115 associated with these outbreaks was 6 (range 2–331). As at 27 December, 49%  
116 (13,957/28,312) of all confirmed COVID-19 cases notified in Australia, excluding NSW  
117 outbreak cases prior to 5 July 2020, were associated with an outbreak affecting  $\geq 2$  persons.

118 The overall rate of COVID-19 outbreaks during the surveillance period was 3.3  
119 outbreaks per 100,000 population. The highest rates were in Victoria (10.3 per 100,000  
120 population; Table. 1). Victoria reported the largest proportion of outbreaks (81%, 691/853)  
121 and associated cases (83%, 11,610/13,957), followed by NSW, excluding cases prior to 5 July  
122 2020 (6%, 54/853 outbreaks, 5%, 642/13,957 cases). Overall, multi-jurisdictional outbreaks  
123 had the second highest proportion of cases (6%, 875/13,957), with a median number of cases  
124 of 15 (range 2 – 331; Table 1).

125 **Table 1. Outbreaks of COVID-19 by state and territory, Australia, 28 January – 27 December**  
126 **2020.**

| State or territory | Number of outbreaks | Median size (persons) per outbreak | Number hospitalised | Outbreak rate per 100 000 population |
|--------------------|---------------------|------------------------------------|---------------------|--------------------------------------|
| ACT                | 2                   | 5                                  | 1                   | 0.5                                  |
| NSW *              | 54                  | 9                                  | N/A                 | 0.7                                  |
| NT                 | 0                   | -                                  | -                   | -                                    |
| Qld                | 36                  | 3                                  | 78                  | 0.7                                  |
| SA                 | 23                  | 4                                  | 26                  | 1.3                                  |
| Tas                | 4                   | 5                                  | 30                  | 0.7                                  |
| Vic                | 691                 | 6                                  | 1,660               | 10.3                                 |
| WA                 | 21                  | 5                                  | 76                  | 0.8                                  |
| MJO                | 22                  | 15                                 | 176                 | -                                    |
| Total              | 853                 | -                                  | 2,047               | -                                    |

127 \* NSW commenced reporting COVID-19 outbreaks from 5 July 2020 onwards. COVID-19:  
128 coronavirus disease 2019; ACT: Australian Capital Territory; NSW: New South Wales; NT: Northern  
129 Territory; Qld: Queensland; SA: South Australia; Tas: Tasmania; Vic: Victoria; WA: Western  
130 Australia, MJO: Multi-jurisdictional outbreak.

131

## 132 National trend

133           The pattern of outbreaks followed the wider epidemic in Australia, defined by two  
134 distinct waves relative to 1 June 2020 (Fig 1). Outbreaks in the first wave peaked in March  
135 2020 and subsided by 31 May 2020, at which time COVID-Net sites reported 133 outbreaks.  
136 In the second wave, the source of infection for the primary case was locally acquired in 98%  
137 (705/720) of outbreaks compared to only 50% (67/133) in the first wave (odds ratio 47.7, 95%  
138 confidence interval 25.8–88.2), reflecting the impact of international travel restrictions  
139 progressively introduced from 15 March 2020.

140 **Fig 1. Number of outbreaks by specimen collection date of the primary case in the outbreak,**  
141 **Australia, 28 January – 27 December 2020, with timing of key public health measures.**

142 Adapted from “COVID-19 notifications in Australia: Epidemiology Report 30” by COVID-19 National  
143 Incident Room Surveillance Team, 2020, Comm Dis Intel, 44, <https://doi.org/10.33321/cdi.2020.44.91>.  
144 Copyright 2020 by Commonwealth of Australia

145 \* High-level restrictions include: compulsory mask-wearing in public; restrictions to travel within 5km  
146 from home; night-time curfew all non-essential retail and services closed; restaurants and cafes  
147 takeaway only; work from home unless essential worker; and online schooling. ^Lower-level restriction  
148 include: compulsory mask-wearing in public; exercise for two hours per day with one other person;  
149 restrictions to travel within 5km from home; some non-essential retail open; work from home unless  
150 essential worker; schools reopen for vulnerable children or whose parents cannot work from home.

151

152           The number of outbreaks in the second wave was much larger, characterised by  
153 sustained community transmission in one state — Victoria. The number of outbreaks reported  
154 each week increased exponentially (Fig 1). The peak in the number of COVID-19 cases was  
155 observed nationally in August 2020 when outbreak numbers had started to decline.

## 156 **Outbreak size and duration**

157           The majority (40%, 340/853) of outbreaks had between 6 and 24 cases, and many (32%,  
158 275/853) were smaller outbreaks of 3 to 5 cases. The median outbreak duration increased  
159 proportionally to the number of cases associated with an outbreak (Table 2).

160

161 **Table 2. Outbreak size by duration, Australia, 28 January – 27 December 2020.**

| <b>Size<br/>(number of cases)</b> | <b>Number of outbreaks<br/>(%)</b> | <b>Median duration<br/>(days)</b> | <b>Duration range<br/>(min – max)</b> |
|-----------------------------------|------------------------------------|-----------------------------------|---------------------------------------|
| 2                                 | 122 (14%)                          | 18                                | 14 – 86                               |
| 3 to 5                            | 275 (32%)                          | 21                                | 14 – 113                              |
| 6 to 24                           | 340 (40%)                          | 29                                | 15 – 132                              |
| 25 to 49                          | 56 (7%)                            | 38                                | 14 – 99                               |
| 50 to 74                          | 16(2%)                             | 51                                | 27 – 102                              |
| 75 to 99                          | 15 (2%)                            | 54                                | 33 – 111                              |
| 100+                              | 29 (3%)                            | 64                                | 21 – 138                              |

162

163 The largest multi-jurisdictional outbreak occurred on a cruise ship among passengers  
164 and crew (n=854)[14]. Of cases, 296 passengers were reported by COVID-Net (excluding  
165 NSW), while 367 NSW passenger cases and 197 crew cases were documented in the Special  
166 Commission of Inquiry into the Ruby Princess [10]. The number of secondary cases among  
167 Australian residents who were infected by passengers and crew on board the ship was difficult  
168 to ascertain for this outbreak. The largest single jurisdictional outbreak occurred in a residential  
169 aged care facility (RACF) (n=301) and lasted for 86 days.

## 170 **Outbreak setting**

171 During the two study periods, there were four settings where 60% (509/853) of COVID-  
172 19 outbreaks and 67% (9,350/13,957) of outbreak-associated cases occurred (S1 Appendix; S2  
173 Appendix). Workplace/industry settings comprised 22% (190/853) of outbreaks and 11%  
174 (1,560/13,957) of cases (median=5, range 2–69). These outbreaks most frequently occurred in  
175 offices or call centres (n=31), unspecified workplaces (n=28), and non-food manufacturing  
176 (n=26). Educational settings comprised 14% (122/853) of outbreaks and 9% (1,189/13,957)  
177 of cases (median=6, range 2 – 209). Outbreaks in education settings occurred in secondary  
178 schools (n=52), primary schools (n=31), and combined primary-secondary schools (n=18).  
179 Outbreaks in RACF comprised 13% (114/853) of all outbreaks and 38% (5,275/13,957) of  
180 cases (median=11, range 2 – 301). Sixty-nine per cent (79/114) of these RACF outbreaks



181 occurred between 1 June and 31 July 2020. Lastly, 10% (83/853) of outbreaks occurred in  
182 hospitals affecting 10% (1,326/13,957) of outbreak-associated cases. Among these, outbreaks  
183 most frequently occurred in acute care hospitals (n=69).

184 In the first wave, 33% (44/133) of COVID-19 outbreaks were reported in travel and  
185 transport settings, particularly among travel groups (n=21) and on cruise ships (n=14) (Fig 2).  
186 Locally acquired cases associated with these outbreaks occurred across the country. Of the 22  
187 multi-jurisdictional outbreaks, 9 were associated with an outbreak on a cruise ship. Outbreaks  
188 among family and social gatherings (27 outbreaks; median=8, range 2–45) were prominent  
189 during the early stages of the epidemic when non-pharmaceutical interventions were not  
190 introduced. In the second wave, outbreaks and associated cases were predominantly reported  
191 from Victoria and were reported from a variety of settings (Fig 2). Notably, there was a  
192 substantial increase in the number of outbreaks in workplace/industry and educational settings  
193 compared to the first wave (S1 Appendix).

194 **Fig 2. Number of COVID-19 outbreaks, by setting and specimen collection date for the index case**  
195 **per outbreak, Australia, 27 December 2020**

196  
197  
198  
199

## 200 Discussion

201 Australia exerted a high degree of COVID-19 control early in the pandemic through  
202 extensive non-pharmaceutical interventions. Outbreaks alerted health authorities to settings  
203 that required specific restrictions, such as international travel and large social gatherings.  
204 Outbreak data in the second wave strongly reflects the situation in Victoria. Overall, 81%  
205 (691/853) of outbreaks occurred in Victoria, and resulted in additional important transmission

206 settings that were strongly influenced by a change in demographic characteristics of cases in  
207 the second wave.

208         In the first wave, approximately 50% (66/133) of outbreaks were linked to the  
209 introduction of infection from someone who travelled to Australia from overseas — including  
210 those at sea. SARS-CoV-2 is easily transmitted on board cruise ships due to high population  
211 density, crowded communal and living areas, and shared sanitary facilities [15]. Initially,  
212 infected cruise ships passengers disembarked at a range of ports around Australia—in many  
213 instances continuing travel across the country whilst infectious. A coordinated response by  
214 state and territory health authorities was required to rapidly detect and investigate COVID-19  
215 cases among passengers of cruise ships where subsequent multi-jurisdictional outbreaks  
216 occurred. As at 31 May 2020, approximately one third of outbreak associated cases and one  
217 third of deaths were associated with cruise ships. These figures underestimate the actual  
218 number of cases associated with cruise ships due to incomplete reporting of outbreak data to  
219 COVID-Net during this period.

220         After initial epidemic control nationally, Victoria experienced a resurgence of COVID-  
221 19 from an outbreak associated with a quarantine facility [15]. Subsequent community  
222 transmission introduced SARS-CoV-2 into high-risk settings such as RACF, disability  
223 services, and health care. Outbreaks in education and childcare settings peaked when  
224 community transmission was highest during July 2020, suggesting that infections in these  
225 settings were likely driven by community transmission. Children less than 10 years old are  
226 thought to transmit SARS-CoV-2 less than adults and adolescents [16]. Australian and  
227 international evidence indicate transmission of the virus within schools is low and child-to-  
228 child transmission within the school setting is uncommon [17-20]. We did observe a high  
229 number of outbreaks in kindergarten, childcare and primary schools when compared to  
230 secondary educational settings, while outbreaks in secondary schools were generally larger in

231 size. However, there were exceptions to these finding where a single outbreak in primary-  
232 secondary school was associated with 209 cases.

233         The high number of outbreaks in the workplace and industry settings during the second  
234 wave reflects the staging of lockdown measures. Essential workplaces that were not able to  
235 close services or transition workers home such as manufacturers, construction sites, and  
236 warehouses were disproportionately affected. Confined and shared spaces associated with a  
237 lack of physical distance and poor ventilation are known risk factors for outbreaks in workplace  
238 settings [21]. For example, workers in meat processing factories often socialise outside of  
239 work, share transport to work, and work in close proximity in processing lines in poorly  
240 ventilated areas [22, 23]. Although fewer outbreaks occurred in food industry settings, abattoir  
241 and meat processing plant outbreaks were large with a median of 88 cases (range 5–168) and  
242 22 (range 3–212), respectively. The use of surveillance data to explore the role of  
243 superspreader events in settings where environmental conditions are conducive to SARS-CoV-  
244 2 transmission is limited. Better understanding of transmission in such workplace setting  
245 where infectious individuals work closely with many susceptible individuals, will help control  
246 the spread of SARS-CoV-2 as well as inform public health guidance [10, 11].

247         Transmission of SARS-CoV-2 among older people in RACF may result in significant  
248 morbidity and mortality due to age and a high prevalence of co-morbidities [24]. Early in the  
249 response, the Australian Government released national guidelines for COVID-19 outbreaks in  
250 RACF [25]. During the peak of the second wave, the number of outbreaks had surged to 88  
251 outbreaks associated with 4,763 cases. During this time, facilities deployed major public  
252 health strategies to reduce the risk of entry and transmission of SARS-CoV-2 within facilities.  
253 Strategies include the development of outbreak management plans, additional infection control  
254 training of staff, and restricted visitor entry within facilities. Of RACF outbreaks across both  
255 epidemic waves, nearly half (46%, 397/853) involved 5 cases or less (Table 2). Nationally,

256 outbreaks with longer duration were not necessarily those with the highest case numbers or  
257 deaths. This may be due to some facilities experiencing two outbreaks or having gaps of at  
258 least 14 days between cases.

## 259 **Limitations**

260         These surveillance data are subject to several limitations. Firstly, NSW did not report  
261 data to COVID-Net for the entire surveillance period, and therefore the picture of outbreaks in  
262 Australia during the first wave is incomplete. Secondly, we cannot comment on outbreak risk  
263 by setting in the absence of denominator data. However, these data do provide insight into  
264 highly affected settings. Thirdly, there was potential for variation in the classification of where  
265 outbreaks occurred, although we attempted to standardise this through use of a common  
266 database with standardised definitions. In addition, the development of national guidance for  
267 screening and testing of cases and close contacts changed as understanding of SARS-CoV-2  
268 transmission increased. Higher rates of screening of staff and residents in certain high-risk  
269 settings such as in hotel quarantine and RACF, inevitably improved outbreak detection in these  
270 settings resulting in a bias towards detecting cases and outbreaks. As surveillance data are  
271 subject to change due to reconciliation, outbreaks and case data reported in our report may vary  
272 from previously published reports. Finally, our definition of an outbreak requires two or more  
273 linked cases. States and territories have gradually moved to the presence of a single case in any  
274 setting as an outbreak definition [4].

275

## 276 **Conclusion**

277         During 2020, Australia experienced fewer cases and outbreaks than many other higher  
278 income countries. This was the result of concerted efforts at all levels of society, including

279 governments and industry, along with extremely high levels of community engagement.  
280 Efforts by jurisdictions to maintain robust isolation of cases and contact tracing capability was  
281 critical to prevent community transmission. Our findings demonstrate that multi-jurisdictional  
282 outbreaks of COVID-19 occurred regularly prior to domestic and international border closures  
283 and require a rapid and coordinated response. Strong public health policies on physical  
284 distancing and hygiene, particularly in high-risk settings, will assist in the prevention of  
285 outbreaks across all settings. As the rollout of COVID-19 vaccines occurs, it is vital outbreak  
286 investigation teams prepare to monitor changing transmission within Australia, particularly  
287 within closed cohorts of people. Robust outbreak investigations may indicate groups with  
288 lower vaccine coverage and will assist with estimating vaccine effectiveness. There are many  
289 lessons to learn from Australia's experiences to prepare for and manage COVID-19 outbreaks  
290 in this period of high epidemic control. Ongoing surveillance and analysis of COVID-19  
291 outbreaks will provide an important indicator in response to evolving policies and response  
292 strategies for Australia and other countries.

293

## 294 **Acknowledgements**

295 The COVID-Net surveillance network conducted surveillance of outbreaks in  
296 partnership with a range of stakeholders, particularly state and territory health departments. We  
297 thank the CDNA for their work to coordinate surveillance and response in Australia and review  
298 of this document. We thank the COVID-Net epidemiologists, project officers and interviewers  
299 at jurisdictional health departments who contributed to this report. We thank Rose Wright and  
300 Kate Ward from the Australian Government Department of Health and Tracey Tsang from  
301 NSW Health for their review of the manuscript. We acknowledge the work of various public

302 health professionals and laboratory staff around Australia who tested specimens and  
303 investigated outbreaks. The quality of their work was the foundation of this report.

## 304 **References**

- 305 1. Wu P, Hao X, Lau EHY, Wong JY, Leung KSM, Wu JT, et al. Real-time tentative  
306 assessment of the epidemiological characteristics of novel coronavirus infections  
307 in Wuhan, China, as at 22 January 2020. *Euro Surveill.* 2020; 25(3). doi:  
308 10.2807/1560-7917.ES.2020.25.3.2000044.
- 309 2. Communicable Disease Network of Australia. Coronavirus Disease 2019  
310 (COVID-19) - CDNA National Guidelines for Public Health Units. 2021 Mar 4.  
311 Canberra. Available from:  
312 [https://www1.health.gov.au/internet/main/publishing.nsf/Content/cdna-song-](https://www1.health.gov.au/internet/main/publishing.nsf/Content/cdna-song-novel-coronavirus.htm)  
313 [novel-coronavirus.htm](https://www1.health.gov.au/internet/main/publishing.nsf/Content/cdna-song-novel-coronavirus.htm).
- 314 3. Petersen E, Koopmans M, Go U, Hamer DH, Petrosillo N, Storgaard M, et al.  
315 Comparing SARS-CoV-2 with SARS-CoV and influenza pandemics. *Lancet*  
316 *Infect Dis.* 2020; 20: e238-44. doi: 10.1016/S1473-3099(20)30484-9.
- 317 4. Hu B, Guo H, Zhou P, Shi Z. Characteristics of SARS-CoV-2 and COVID-19.  
318 *Nat Rev Microbiol.* 2020;19: 141-54. doi: 10.1038/s41579-020-00459-7.
- 319 5. Eichler N, Thornley C, Swadi T, Devine T, McElnay C, Sherwood J, et al.  
320 Transmission of Severe Acute Respiratory Syndrome Coronavirus 2 during  
321 Border Quarantine and Air Travel, New Zealand (Aotearoa). *Emerg Infect Dis.*  
322 2021;27(5). doi: 10.3201/eid2705.210514.
- 323 6. Dasha M, Benson J, Pitts J, Stebbing J. SARS-CoV-2 (COVID-19) superspreader  
324 events. *J Infect.* 2020;82(1): 36-40. doi: 10.1016/j.jinf.2020.11.021.
- 325 7. Hamner L DP, Capron I, Ross A, Jordan A, Lee J, et al. High SARS-CoV-2  
326 Attack Rate Following Exposure at a Choir Practice — Skagit County,  
327 Washington. *MMWR Morb Mortal Wkly Rep.* 2020; 69: 606-10. doi:  
328 10.15585/mmwr.mm6919e6.
- 329 8. Han ZY, Weng WG, Huang QY. Characterizations of particle size distribution of  
330 the droplets exhaled by sneeze. *J R Soc Interface.* 2013; 10(88). doi:  
331 10.1098/rsif.2013.0560.
- 332 9. Borak J. Airborne Transmission of COVID-19. *Occup Med.* 2020;70(5): 297-9.  
333 doi: 10.1093/occmed/kqaa080.
- 334 10. Althouse BM, Wenger EA, Miller JC, Scarpino SV, Allard A, Hébert-Dufresne L,  
335 et al. Superspreading events in the transmission dynamics of SARS-CoV-2:  
336 Opportunities for interventions and control. *PLoS Biol.* 2020; 18(11). doi:  
337 10.1371/journal.pbio.3000897.
- 338 11. Frieden TR, Lee C. Identifying and Interrupting Superspreading Events -  
339 Implication for Control of Sever Acute Respiratory Syndrome Coronavirus 2.  
340 *Emerg Infect Dis.* 2020;26(6): 1059-66. doi: 10.3201/eid2606.200495.
- 341 12. Australian Government Department of Health. Australian National Disease  
342 Surveillance Plan for COVID-19. Canberra, Australia. 2020. Available from:  
343 [https://www.health.gov.au/resources/publications/australian-national-disease-](https://www.health.gov.au/resources/publications/australian-national-disease-surveillance-plan-for-covid-19)  
344 [surveillance-plan-for-covid-19](https://www.health.gov.au/resources/publications/australian-national-disease-surveillance-plan-for-covid-19).

- 345 13. Harris PA, Taylor R, Thielke R, Payne J, Gonzalez N, Conde JG. Research  
346 electronic data capture (REDCap)--a metadata-driven methodology and workflow  
347 process for providing translational research informatics support. *J Biomed Inform.*  
348 2009;42(2): 377-81. doi: 10.1016/j.jbi.2008.08.010.
- 349 14. Government of New South Wales. Report of the Special Commission of Inquiry  
350 into the Ruby Princess. Sydney, Australia. 2020. Available from:  
351 [https://www.dpc.nsw.gov.au/assets/dpc-nsw-gov-au/publications/The-Special-](https://www.dpc.nsw.gov.au/assets/dpc-nsw-gov-au/publications/The-Special-Commission-of-Inquiry-into-the-Ruby-Princess-Listing-1628/Report-of-the-Special-Commission-of-Inquiry-into-the-Ruby-Princess.pdf)  
352 [Commission-of-Inquiry-into-the-Ruby-Princess-Listing-1628/Report-of-the-](https://www.dpc.nsw.gov.au/assets/dpc-nsw-gov-au/publications/The-Special-Commission-of-Inquiry-into-the-Ruby-Princess-Listing-1628/Report-of-the-Special-Commission-of-Inquiry-into-the-Ruby-Princess.pdf)  
353 [Special-Commission-of-Inquiry-into-the-Ruby-Princess.pdf](https://www.dpc.nsw.gov.au/assets/dpc-nsw-gov-au/publications/The-Special-Commission-of-Inquiry-into-the-Ruby-Princess-Listing-1628/Report-of-the-Special-Commission-of-Inquiry-into-the-Ruby-Princess.pdf).
- 354 15. Department of Health and Human Services Victoria. Tracking coronavirus in  
355 Victoria. Melbourne, Australia. 2020. Available from:  
356 <https://www.dhhs.vic.gov.au/tracking-coronavirus-victoria>.
- 357 16. Park YJ, Choe YJ, Park O, Park SY, Kim Y-M, Kim J, et al. Contact Tracing  
358 during Coronavirus Disease Outbreak, South Korea, 2020. *Emerg Infect Dis.*  
359 2020;26(10): 2465-8. doi: 10.3201/eid2610.201315.
- 360 17. Heavey L, Casey G, Kelly C, Kelly D, McDarby G. No evidence of secondary  
361 transmission of COVID-19 from children attending school in Ireland, 2020. *Euro*  
362 *Surveill.* 2020; 25(21). doi: 10.2807/1560-7917.ES.2020.25.21.2000903.
- 363 18. Ismail SA, Saliba V, Lopez Bernal J, Ramsay ME, Ladhani SN. SARS-CoV-2  
364 infection and transmission in educational settings: cross-sectional analysis of  
365 clusters and outbreaks in England. *Lancet Infect Dis.* 2021; 21(3): 344-53. doi:  
366 10.1016/S1473-3099(20)30882-3.
- 367 19. Ludvigsson JF. Children are unlikely to be the main drivers of the COVID-19  
368 pandemic - A systematic review. *Acta Paediatr.* 2020;109(8): 1525-30. doi:  
369 10.1111/apa.15371.
- 370 20. Russell F, Ryan K, Snow K, Danchin M, Mulholland K, Goldfeld S. COVID-19  
371 in Victorian Schools: An analysis of child-care and school outbreak data and  
372 evidence-based recommendations for opening schools and keeping them open.  
373 Murdoch Children's Research Institute & the University of Melbourne.  
374 Melbourne, Australia. 2020. Available from:  
375 [https://www.dhhs.vic.gov.au/sites/default/files/documents/202009/Report-](https://www.dhhs.vic.gov.au/sites/default/files/documents/202009/Report-summary-COVID-19-in-victorian-schools-pdf.pdf)  
376 [summary-COVID-19-in-victorian-schools-pdf.pdf](https://www.dhhs.vic.gov.au/sites/default/files/documents/202009/Report-summary-COVID-19-in-victorian-schools-pdf.pdf).
- 377 21. European Centre for Disease Prevention and Control. COVID-19 clusters and  
378 outbreaks in occupational settings in the EU/EEA and the UK. Stockholm,  
379 Sweden. 2020. Available from:  
380 [https://www.ecdc.europa.eu/sites/default/files/documents/COVID-19-in-](https://www.ecdc.europa.eu/sites/default/files/documents/COVID-19-in-occupational-settings.pdf)  
381 [occupational-settings.pdf](https://www.ecdc.europa.eu/sites/default/files/documents/COVID-19-in-occupational-settings.pdf).
- 382 22. Steinberg J, Kennedy E, Basler C, Grant M, Jacobs J, Ortbahn D, et al. COVID-19  
383 Outbreaks Among Employees at a Meat Processing Factory - South Dakota,  
384 March-April 2020. *MMWR Morb Mortal Wkly Rep.* 2020;60:1015-9. doi:  
385 10.15585/mmwr.mm6931a2.
- 386 23. Zhao L, Qi Y, Luzzatto-Fegiz P, Cui Y, Zhu Y. COVID-19: Effects of  
387 Environmental Conditions on the Propagation of Respiratory Droplets. *Nano Lett.*  
388 2020;20(10):7744-50. doi: 10.1021/acs.nanolett.0c03331.

- 389 24. Ladhani S, Chow J, Janarthanan R, Fok J, Crawley-Boevey E, Vusirikala A, et al.  
390 Investigation of SARS-CoV-2 outbreaks in six care homes in London, April 2020.  
391 EClinicalMedicine. 2020;26:100533. doi: 10.1016/j.eclinm.2020.100533.  
392 25. Australian Government Department of Health. Coronavirus Disease 2019  
393 (COVID-19) Outbreaks in Residential Care Facilities: CDNA National Guidelines  
394 for the Prevention, Control and Public Health Management of COVID-19  
395 Outbreaks in Residential Care Facilities in Australia. Canberra, Australia. 2020.  
396 Available from: [https://www.health.gov.au/resources/publications/cdna-national-](https://www.health.gov.au/resources/publications/cdna-national-guidelines-for-the-prevention-control-and-public-health-management-of-covid-19-outbreaks-in-residential-care-facilities-in-australia)  
397 [guidelines-for-the-prevention-control-and-public-health-management-of-covid-](https://www.health.gov.au/resources/publications/cdna-national-guidelines-for-the-prevention-control-and-public-health-management-of-covid-19-outbreaks-in-residential-care-facilities-in-australia)  
398 [19-outbreaks-in-residential-care-facilities-in-australia](https://www.health.gov.au/resources/publications/cdna-national-guidelines-for-the-prevention-control-and-public-health-management-of-covid-19-outbreaks-in-residential-care-facilities-in-australia).

399

## 400 **Supporting information**

401

402 **S1 Appendix. Outbreaks of COVID-19 by setting and sub-setting, Australia, 28 January**  
403 **– 27 December 2020.**

404

405 **S2 Appendix. COVID-Net definition of outbreak settings and sub-settings.**



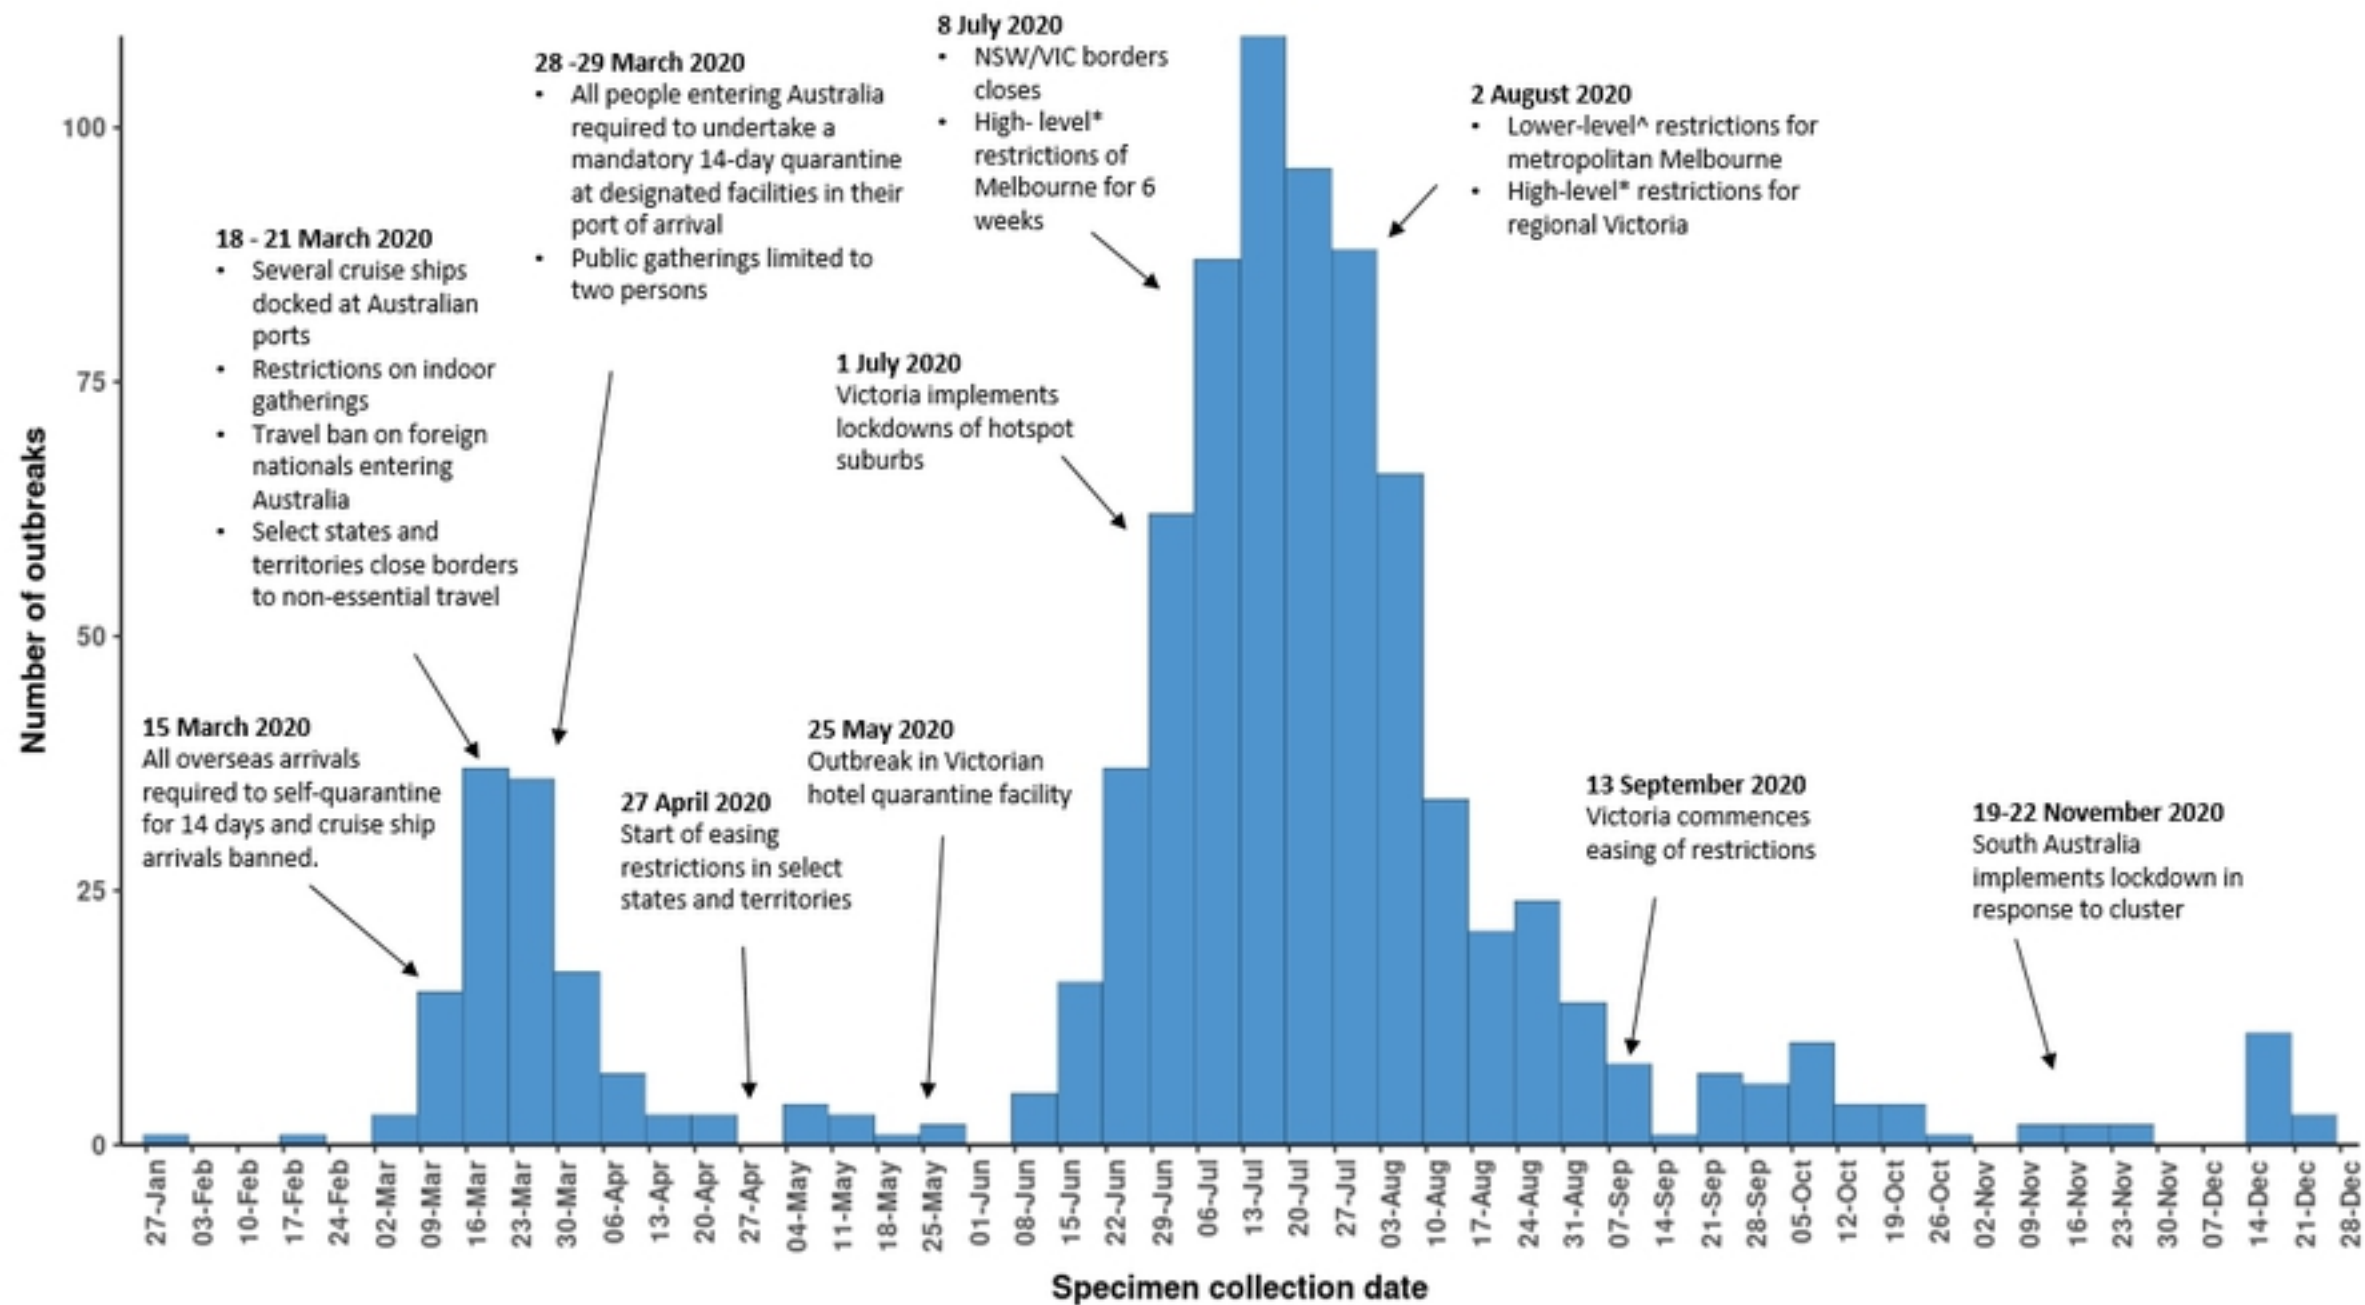

Figure 1

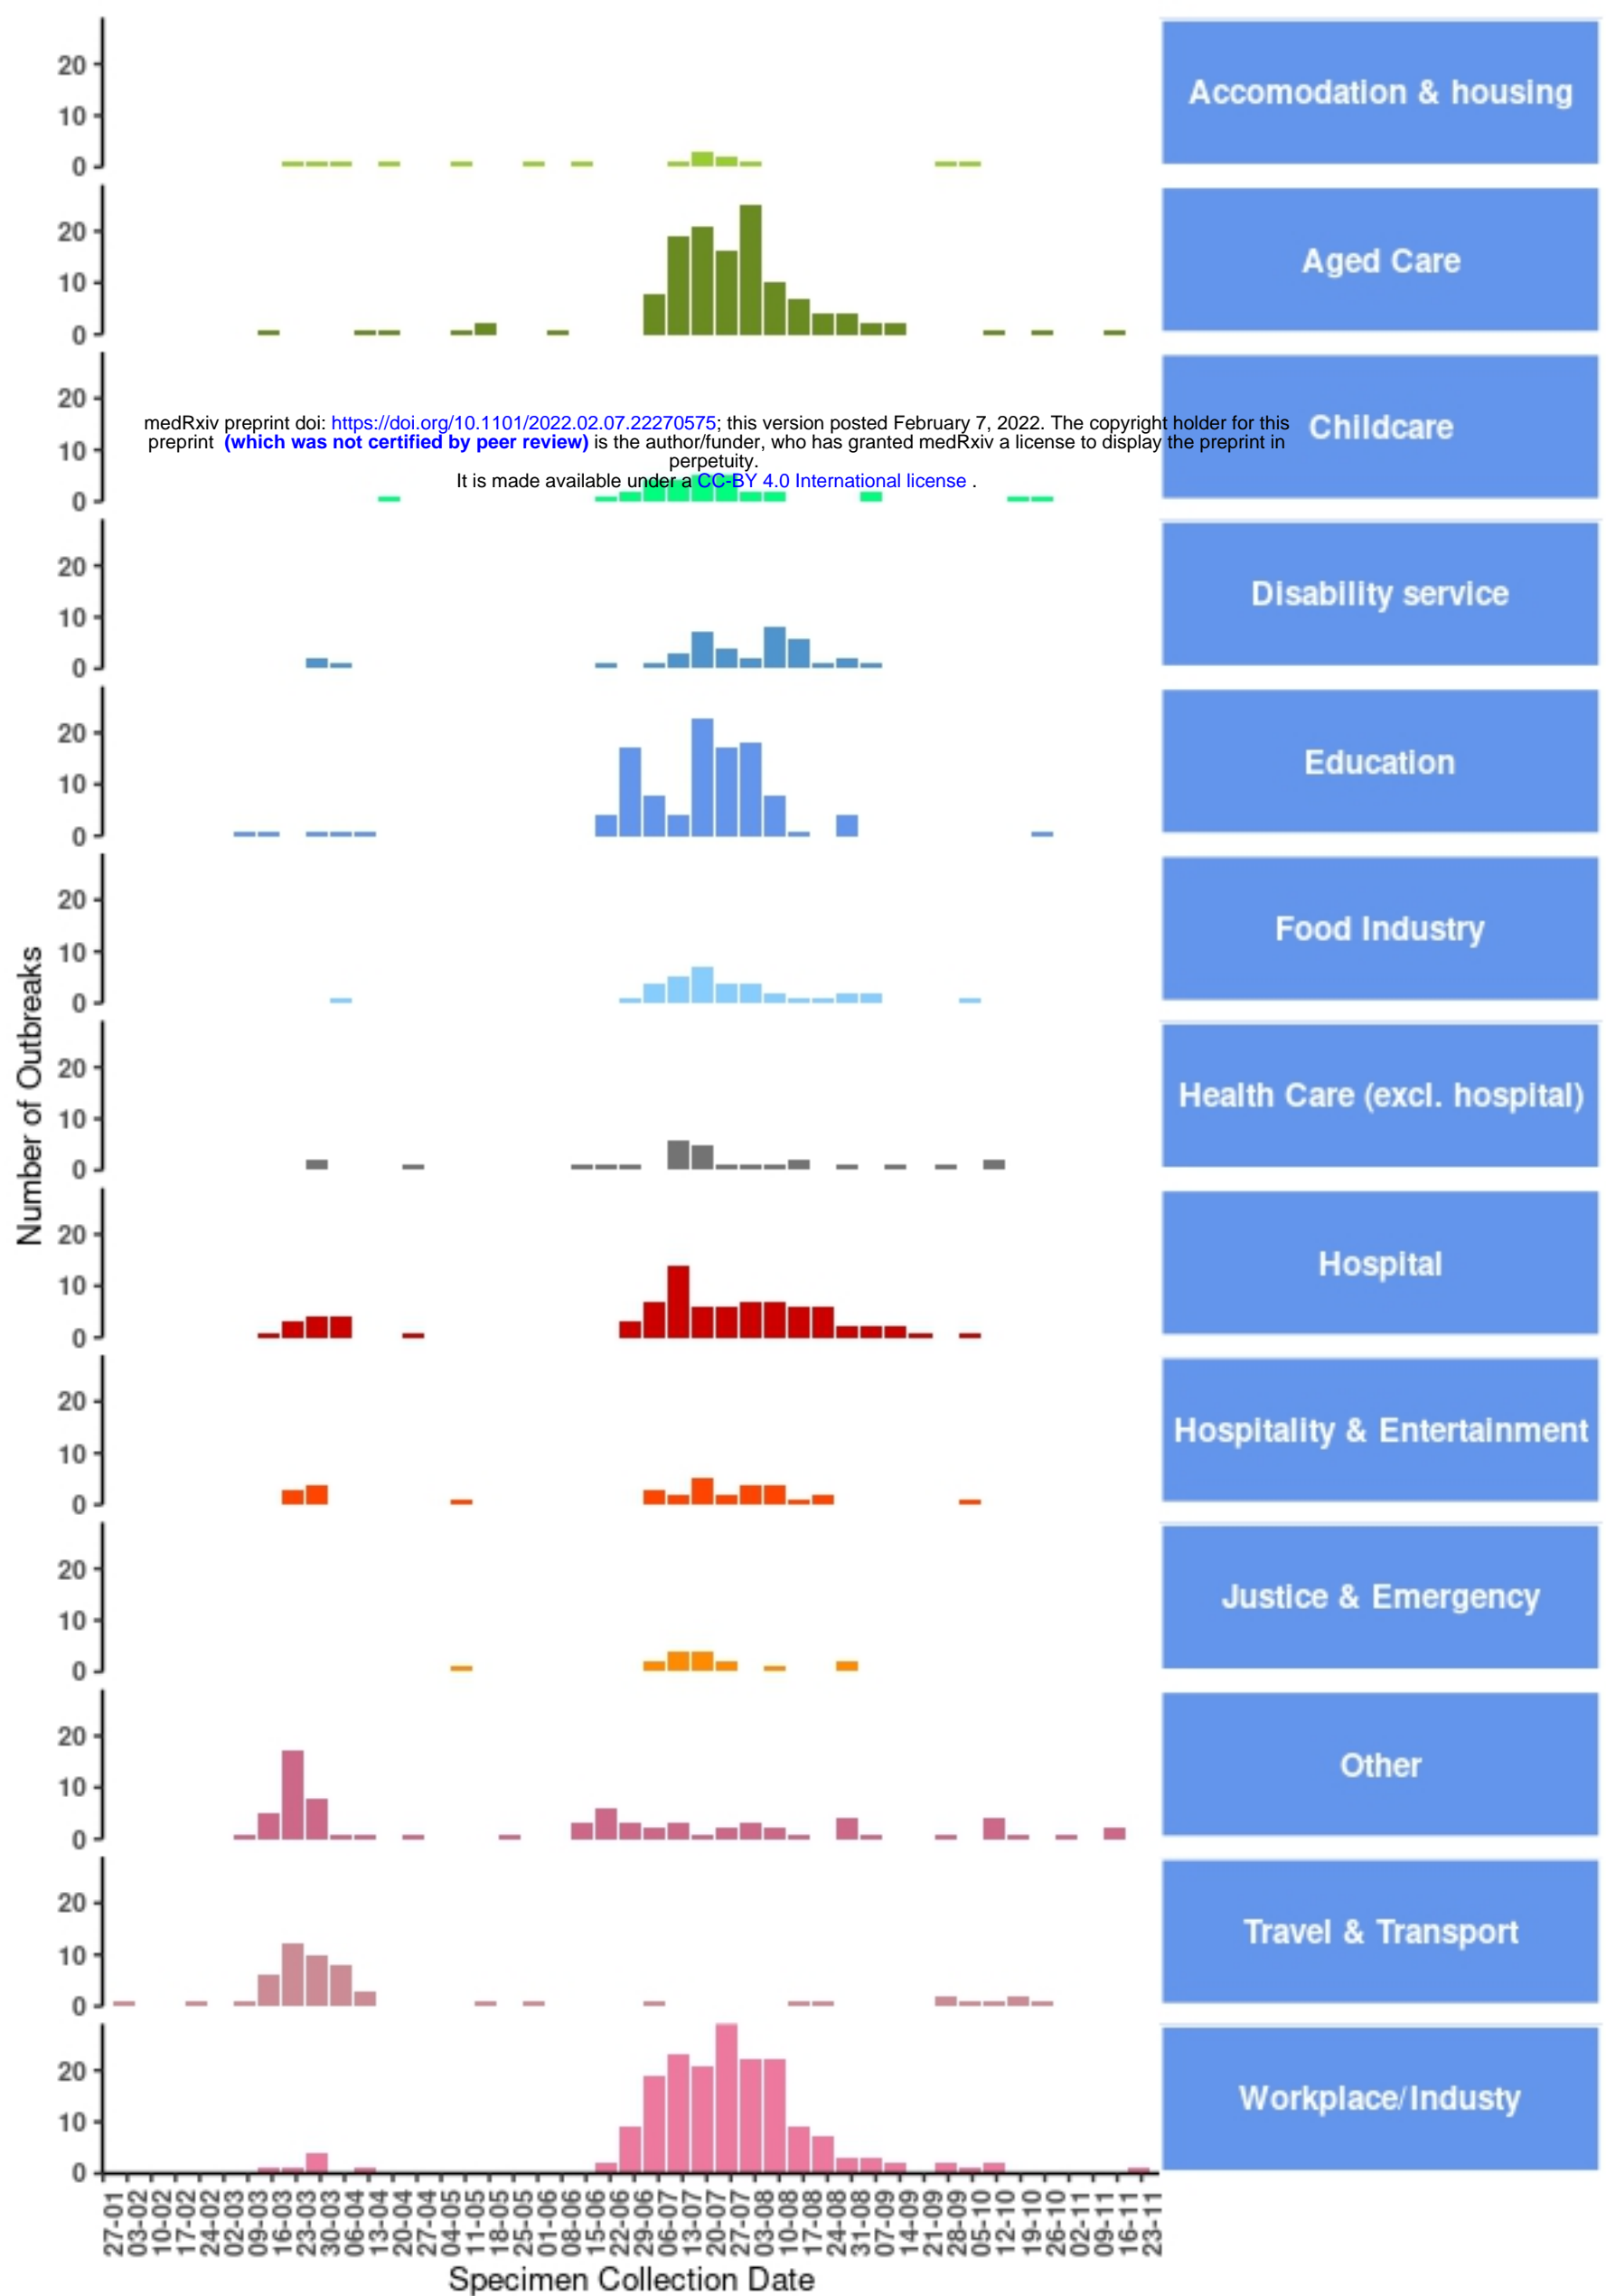

Figure 2
